# Supplementary material for: Three in one: a cadmium bismuth vanadate NLO crystal exhibiting a large second-harmonic generation response and enhanced birefringence
Source: Royal Society of Chemistry journal article supplement (doi:10.1039/d4qi00261j), 2024-01-01
Supplement: d4qi00261j1.pdf [file d4qi00261j1.pdf]

## Electronic Supplementary Information

### Three In One: A Cadmium Bismuth Vanadate Nonlinear Optical Crystal Exhibiting a Large Second-Harmonic Generation Response and Enhanced Birefringence

Shuya Liu,<sup>a</sup> Conggang Li,<sup>\*,a,c</sup> Jinmiao Jiao,<sup>a</sup> Yuheng She,<sup>a</sup> Tinghui Zhang,<sup>a</sup> Dianxing Ju,<sup>b</sup> Ning Ye,<sup>a</sup> Zhanggui Hu<sup>\*,a</sup> and Yicheng Wu<sup>a</sup>

<sup>a</sup>Tianjin Key Laboratory of Functional Crystal Materials, Institute of Functional Crystal, Tianjin University of Technology, Tianjin 300384, China.

<sup>b</sup>College of Materials Science and Engineering, Qingdao University of Science and Technology, Qingdao 266042, P.R. China.

<sup>c</sup>State Key Laboratory of Crystal Materials, Shandong University, Jinan, 250100, China.

\*Corresponding author: E-mail address: cgli@email.tjut.edu.cn; hu@mail.ipc.ac.cn

1. **Table S1.** Selected bond lengths (Å) and angles (deg.) for Cd<sub>2</sub>BiVO<sub>6</sub>.
2. **Table S2.** Atomic coordinates ( $\times 10^4$ ) and equivalent isotropic displacement parameters ( $\text{Å}^2 \times 10^3$ ) for Cd<sub>2</sub>BiVO<sub>6</sub>.  $U_{eq}$  is defined as one-third of the trace of the orthogonalized  $U_{ij}$  tensor, and the bond valence sum for each atom in asymmetric unit.
3. **Fig. S1.** PXRD curves of Cd<sub>2</sub>BiVO<sub>6</sub> after melting compared with the calculated data of Cd<sub>2</sub>BiVO<sub>6</sub>.
4. **Fig. S2.** EDS of Cd<sub>2</sub>BiVO<sub>6</sub> (a) Surface morphology, (b) Atomic ratio of various elements, (c-g) Cd, Bi, V, and O mapping results, respectively.
5. **Fig. S3.** Presentation of Cd<sub>2</sub>BiVO<sub>6</sub> polycrystalline powder.
6. **Fig. S4.** Experimental birefringence measurements. (a-b) Presentation of Cd<sub>2</sub>BiVO<sub>6</sub> before and after extinction under orthotropic polarized light, respectively. (c-d) Observed morphology and theoretical morphology of Cd<sub>2</sub>BiVO<sub>6</sub>, respectively.

**Table S1** Selected bond lengths (Å) and angles (deg.) for Cd<sub>2</sub>BiVO<sub>6</sub>.

|                     |            |                     |           |
|---------------------|------------|---------------------|-----------|
| Bi(1)-O(1)#1        | 2.21(2)    | Cd(1)-O(1)          | 2.241(18) |
| Bi(1)-O(1)          | 2.21(2)    | Cd(1)-O(1)#6        | 2.318(18) |
| Bi(1)-O(1)#2        | 2.25(2)    | Cd(1)-O(2)          | 2.344(7)  |
| Bi(1)-O(1)#3        | 2.25(2)    | Cd(1)-O(3)#7        | 2.352(9)  |
| Bi(1)-O(4)#4        | 2.616(13)  | Cd(1)-O(4)#8        | 2.362(10) |
| V(1)-O(2)           | 1.693(11)  | Cd(1)-O(3)#3        | 2.405(10) |
| V(1)-O(4)           | 1.739(15)  |                     |           |
| V(1)-O(3)           | 1.740(10)  |                     |           |
| V(1)-O(3)#9         | 1.740(10)  |                     |           |
| O(1)#1-Bi(1)-O(1)   | 74.4(8)    | O(1)-Cd(1)-O(1)#6   | 76.69(13) |
| O(1)#1-Bi(1)-O(1)#2 | 78.81(15)  | O(1)-Cd(1)-O(2)     | 90.4(6)   |
| O(1)-Bi(1)-O(1)#2   | 121.47(11) | O(1)#6-Cd(1)-O(2)   | 93.1(6)   |
| O(1)#1-Bi(1)-O(1)#3 | 121.47(11) | O(1)-Cd(1)-O(3)#7   | 113.4(4)  |
| O(1)-Bi(1)-O(1)#3   | 78.81(15)  | O(1)#6-Cd(1)-O(3)#7 | 90.9(5)   |
| O(1)#2-Bi(1)-O(1)#3 | 72.7(8)    | O(2)-Cd(1)-O(3)#7   | 156.2(6)  |
| O(1)#1-Bi(1)-O(4)#4 | 135.1(4)   | O(1)-Cd(1)-O(4)#8   | 109.3(6)  |
| O(1)-Bi(1)-O(4)#4   | 135.1(4)   | O(1)#6-Cd(1)-O(4)#8 | 162.1(4)  |
| O(1)#2-Bi(1)-O(4)#4 | 100.0(5)   | O(2)-Cd(1)-O(4)#8   | 70.4(5)   |
| O(1)#3-Bi(1)-O(4)#4 | 100.0(5)   | O(3)#7-Cd(1)-O(4)#8 | 101.5(4)  |
| O(2)-V(1)-O(4)      | 108.2(11)  | O(1)-Cd(1)-O(3)#3   | 80.8(6)   |
| O(2)-V(1)-O(3)      | 113.7(6)   | O(1)#6-Cd(1)-O(3)#3 | 154.8(5)  |
| O(4)-V(1)-O(3)      | 56.4(5)    | O(2)-Cd(1)-O(3)#3   | 98.2(7)   |
| O(2)-V(1)-O(3)#9    | 113.7(6)   | O(3)#7-Cd(1)-O(3)#3 | 87.7(2)   |
| O(4)-V(1)-O(3)#9    | 56.4(5)    | O(4)#8-Cd(1)-O(3)#3 | 40.3(3)   |
| O(3)-V(1)-O(3)#9    | 105.7(8)   |                     |           |

Symmetry transformations used to generate equivalent atoms:

#1 -x,y,z    #2 -x,-y+1,z-1/2    #3 x,-y+1,z-1/2  
#4 x-1/2,y+1/2,z-1    #5 -x,-y+1,z+1/2    #6 x,-y+1,z+1/2  
#7 -x+1/2,y+1/2,z    #8 -x+1,-y+1,z-1/2    #9 -x+1,y,z  
#10 -x+1/2,y-1/2,z    #11 -x+1,-y+1,z+1/2    #12 x+1/2,y-1/2,z+1

**Table S2** Atomic coordinates ( $\times 10^4$ ) and equivalent isotropic displacement parameters ( $\text{\AA}^2 \times 10^3$ ) for  $\text{Cd}_2\text{BiVO}_6$ .  $U_{\text{eq}}$  is defined as one-third of the trace of the orthogonalized  $U_{ij}$  tensor, and the bond valence sum for each atom in asymmetric unit.

| atom  | x        | y        | z         | U(eq) | BVS    |
|-------|----------|----------|-----------|-------|--------|
| Bi(1) | 0        | 5949(1)  | 2468(2)   | 9(1)  | 2.999  |
| Cd(1) | 2939(1)  | 6148(1)  | 7471(5)   | 10(1) | 1.880  |
| V(1)  | 5000     | 3358(2)  | 7396(18)  | 7(1)  | 4.9049 |
| O(1)  | 1541(7)  | 5051(15) | 4980(50)  | 9(2)  | 2.1080 |
| O(2)  | 5000     | 4829(9)  | 7190(60)  | 9(4)  | 1.9565 |
| O(3)  | 3397(11) | 2796(8)  | 8864(19)  | 16(2) | 1.7407 |
| O(4)  | 5000     | 2983(11) | 10380(30) | 16(3) | 2.0110 |



**Fig. S1** PXRD curves of  $\text{Cd}_2\text{BiVO}_6$  after melting compared with the calculated data of  $\text{Cd}_2\text{BiVO}_6$ .



**Fig. S2** EDS of  $\text{Cd}_2\text{BiVO}_6$  (a) Surface morphology, (b) Atomic ratio of various elements, (c-f) Cd, Bi, V, and O mapping results, respectively.



**Fig. S3** Presentation of  $\text{Cd}_2\text{BiVO}_6$  polycrystalline powder.



**Fig. S4** Experimental birefringence measurements. (a-b) Presentation of  $\text{Cd}_2\text{BiVO}_6$  before and after extinction under orthotropic polarized light, respectively. (c-d) Observed morphology and theoretical morphology of  $\text{Cd}_2\text{BiVO}_6$ , respectively.
